# Supplementary material
Source: PubMed Central journal article supplement (PMC3640995)
Supplement: NIHMS463306-supplement-supplement_1.pdf [file NIHMS463306-supplement-supplement_1.pdf]

**Supplementary Table I** Primers for real-time PCR

| Target           | Forward primer       | Reverse primer         |
|------------------|----------------------|------------------------|
| Lipocalin-2      | CAGAAGGCAGCTTTACGATG | CCTGTGCATATTTCCCAGAG   |
| SR-A             | CCCTCCCTTCAGGAGAAGTT | GGACCTTGAGATGTGTCAGTTG |
| CR3              | AGCATATTGGCTTGGTGGTG | CCCAATGAGGATCAAGTTGG   |
| Catalase         | CCAGATGAAGCAGTGGAAGG | CCCGCGGTCATGATATTAAGT  |
| SOD1             | AAGCATGGCGATGAAAGC   | CCATACTGATGGACGTGGAA   |
| GPX              | ATCCGGGACTACACCGAGA  | ACCAGGTCGGACGTACTTGA   |
| Bcl-2            | AGTACCTGAACCGGCATCTG | CAGGTATGCACCCAGAGTGA   |
| TBP <sup>1</sup> | GCACAGGAGCCAAGAGTGAA | TCACAGCTCCCCACCATGTT   |

<sup>1</sup>TBP, TATA box binding protein.

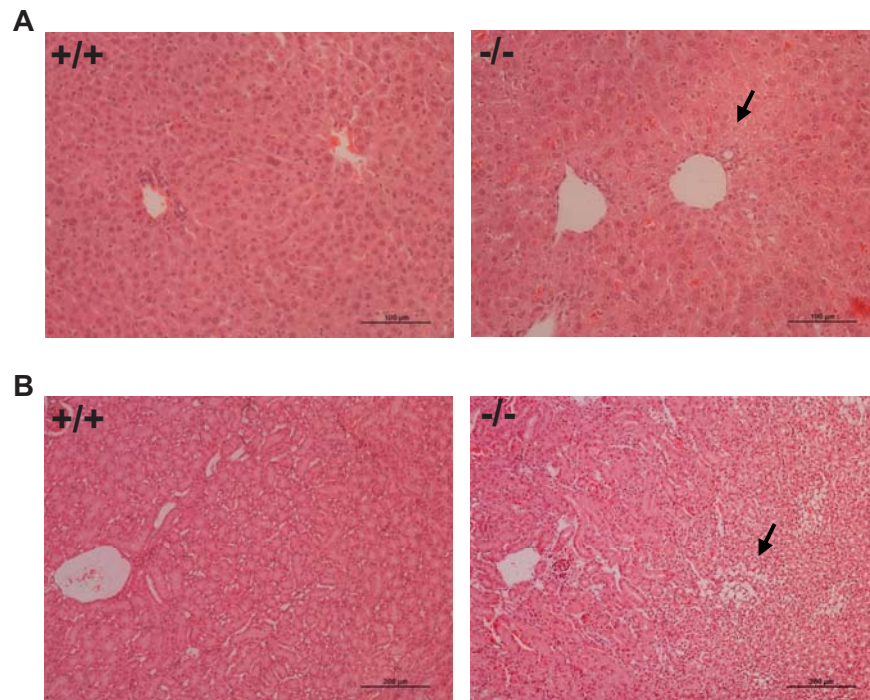

**Supplementary Figure 1. The liver and kidney of SRC-3<sup>-/-</sup> mice have more necrotic areas at 20 h after *E. coli* infection.** The liver (A) and kidney (B) from both types of mice at 20 h after infection were fixed, sectioned, and stained with H&E (Magnification x 200 for liver and Magnification x 100 for kidney). Arrow denotes necrotic areas, scale bars: 100  $\mu$  m (liver) or 200  $\mu$  m (kidney).

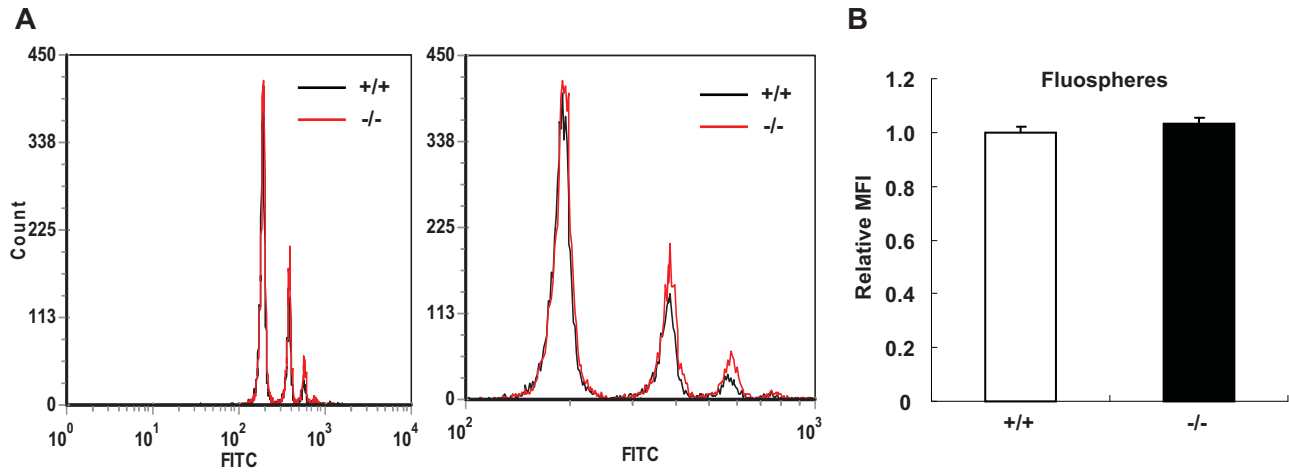

**Supplementary Figure 2. Phagocytosis of fluospheres by both SRC-3<sup>-/-</sup> and wild-type macrophages is comparable.** (A) FACS histogram, left panel is original figure and right panel is enlarged figure. (B) Relative mean fluorescence intensity.

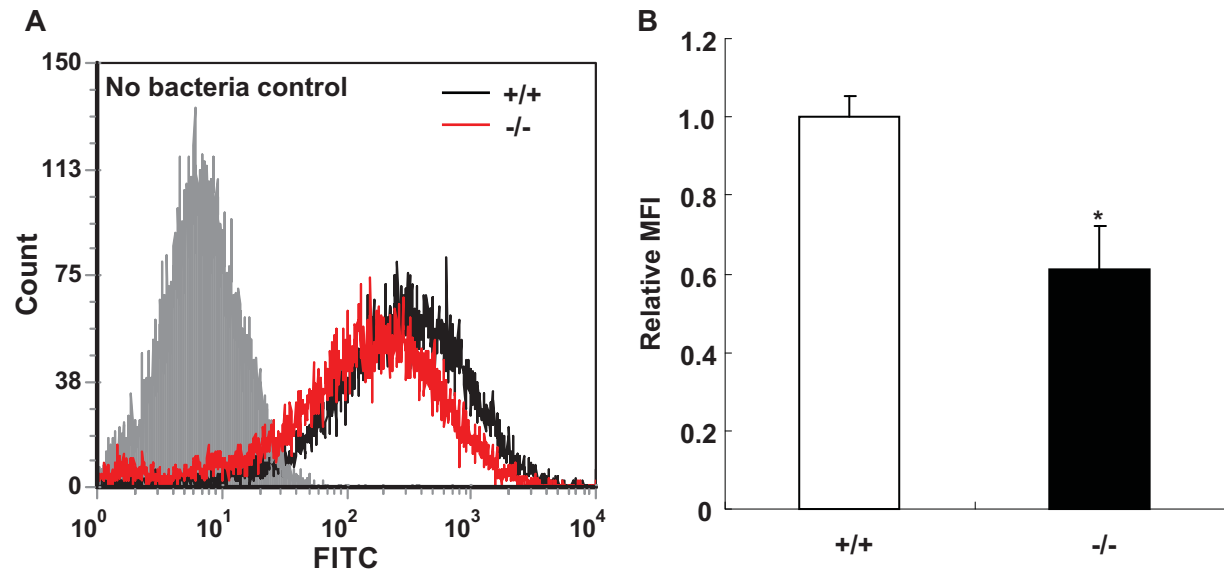

**Supplementary Figure 3. Phagocytosis of *S. aureus* by peritoneal macrophages is decreased in SRC-3<sup>-/-</sup> mice. (A) FACS histogram and (B) Relative mean fluorescence intensity. \*  $p < 0.05$ .**

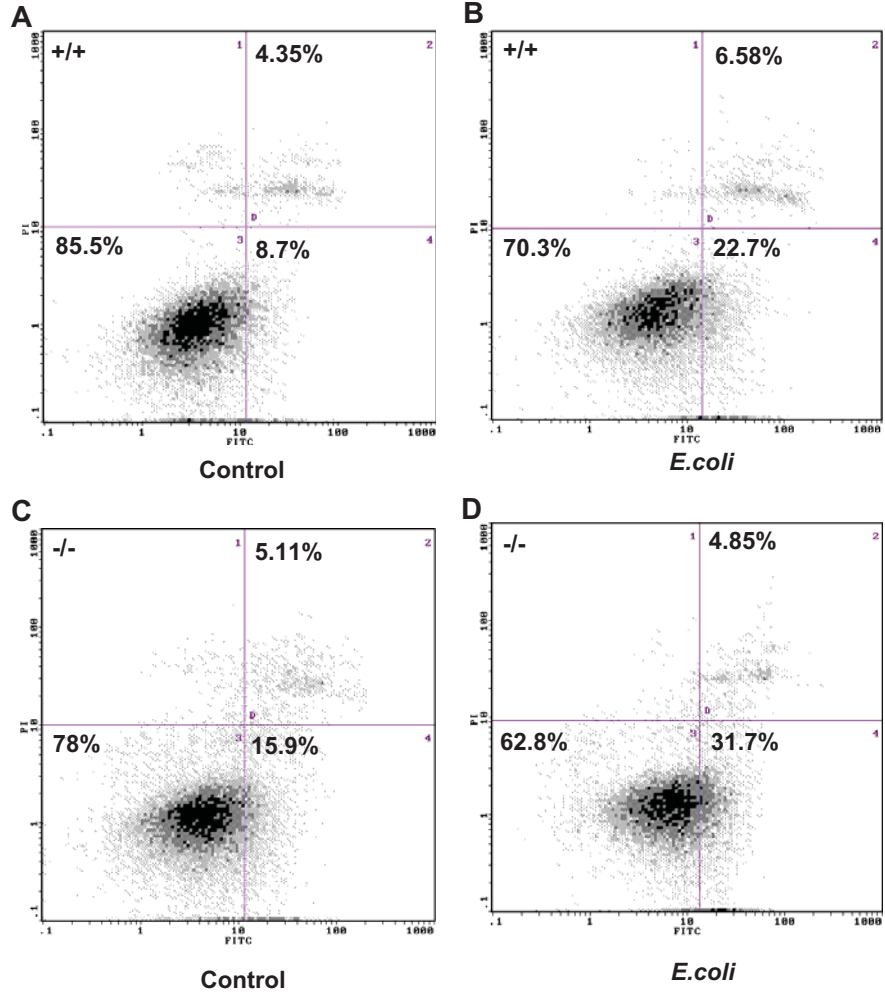

**Supplementary Figure 4. Macrophages from SRC-3<sup>-/-</sup> mice had more apoptotic cells in the absence and presence of *E.coli* by Annexin V staining.** (A) and (B) Macrophages from wild-type mice, (C) and (D) Macrophages from SRC-3<sup>-/-</sup> mice.

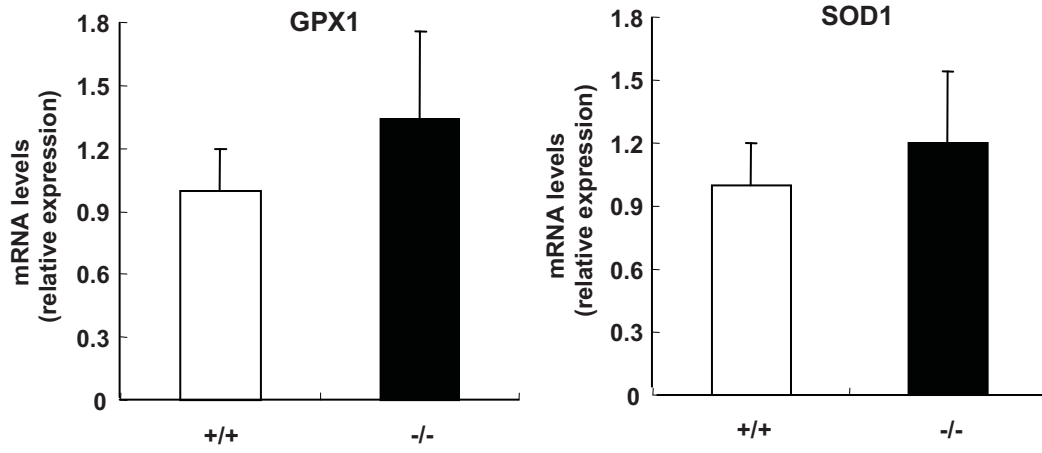

**Supplementary Figure 5.** The expression of GPX1 and SOD1 was determined by real-time PCR. Data are the means + SD of four mice per group.

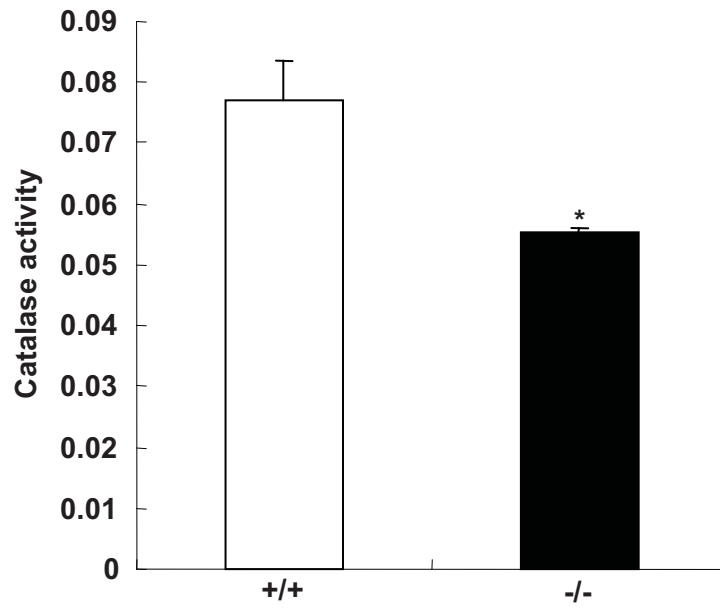

**Supplementary Figure 6. The catalase activity of peritoneal macrophages.** Data are the means + SD of three mice per group. \*  $p < 0.05$ .

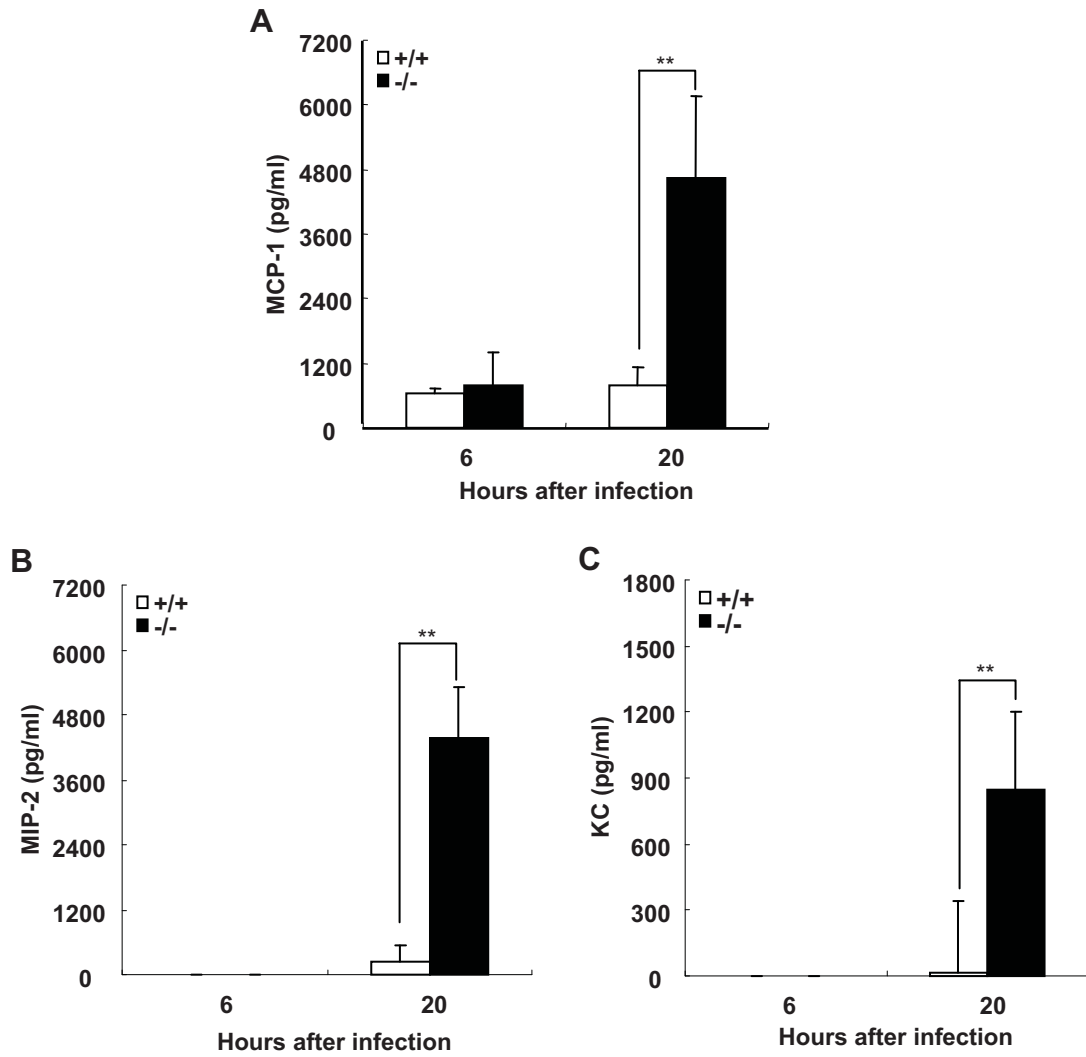

**Supplementary Figure 7. The level of chemokines in the peritoneal fluid from SRC-3<sup>-/-</sup> and wild-type mice after *E. coli* infection. (A) MCP-1, (B) MIP-2, (C) KC. Data are the means + SD of five mice per group. \*\*  $p < 0.01$ .**
